# Supplementary material for: Tumor necrosis factor-α G-308A (rs1800629) polymorphism and aggressive periodontitis susceptibility: a meta-analysis of 16 case-control studies
Source: PubMed Central journal article supplement (PMC4707537; doi:10.1038/srep19099), 2016-01-11

**Tumor necrosis factor- $\alpha$  G-308A (rs1800629) polymorphism and aggressive periodontitis susceptibility: a meta-analysis of 16 case-control studies**

Xue-Mei Wei<sup>1\*</sup>, Yong-Ji Chen<sup>2\*</sup>, Lan Wu<sup>2\*</sup>, Li-Jun Cui<sup>3</sup>, Ding-Wei Hu<sup>1</sup>, Xian-Tao Zeng<sup>2,3</sup>

1. Department of Nursing, Affiliated Hospital of North Sichuan Medical College, Nanchong 637000, P.R. China;
2. Department of Stomatology, Taihe Hospital, Hubei University of Medicine, Shiyan 442000, Hubei Province, China;
3. Department of Vascular Surgery, Affiliated Hospital of North Sichuan Medical College, Nanchong 637000, P.R. China;
4. Center for Evidence-Based and Translational Medicine, Zhongnan Hospital of Wuhan University, Wuhan 430071, China

\*These authors contributed equally to this work.

**Running title:** TNF- $\alpha$  G-308A polymorphism and aggressive periodontitis.

**Correspondence to:** Xian-Tao Zeng, Center for Evidence-Based and Translational Medicine, Zhongnan Hospital of Wuhan University, 169 Donghu Road, Wuchang District, Wuhan 430071, Hubei Province, P.R. China. E-mail: zengxiantao1128@163.com; Tel: +86 027 6781 2817, Fax: +86 027 6781 2817.

Supplementary Fig. S1 Forest plot of overall analysis in AA vs. GG genetic model

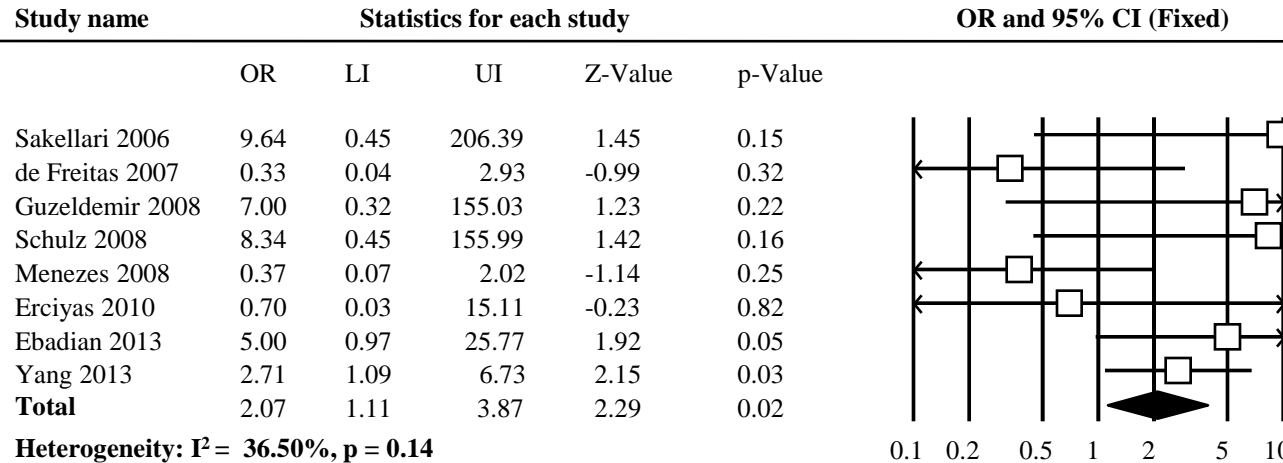

OR = Odds ratio; LI = Lower limit; UI = Upper limit; CI = Confidence interval

Decreased risk    Increased risk

Supplementary Fig. S2 Forest plot of overall analysis in AA vs. AG+GG genetic model

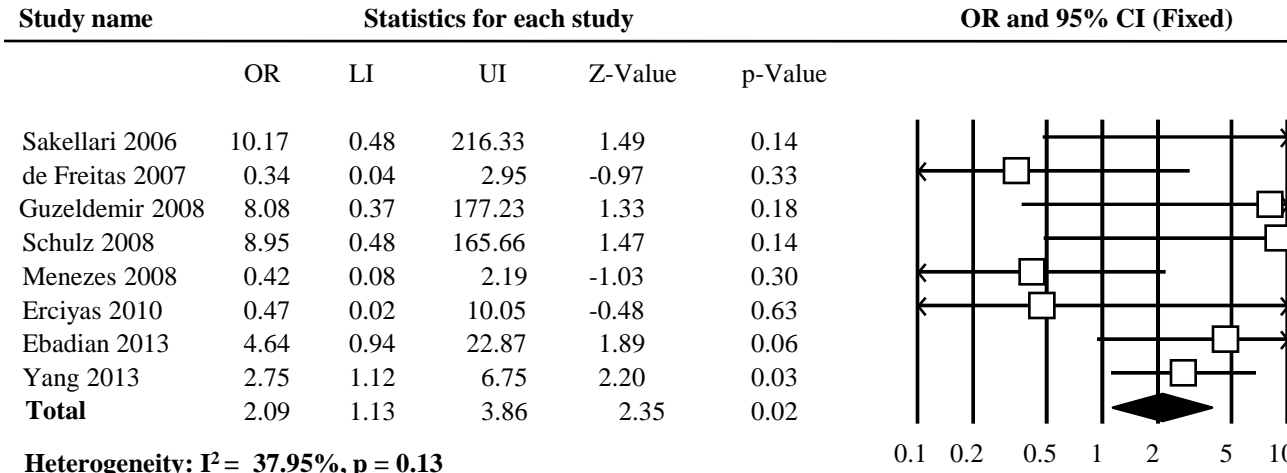

OR = Odds ratio; LI = Lower limit; UI = Upper limit; CI = Confidence interval

Decreased risk    Increased risk

Supplementary Fig. S3 Forest plot of overall analysis in AG vs. GG genetic model

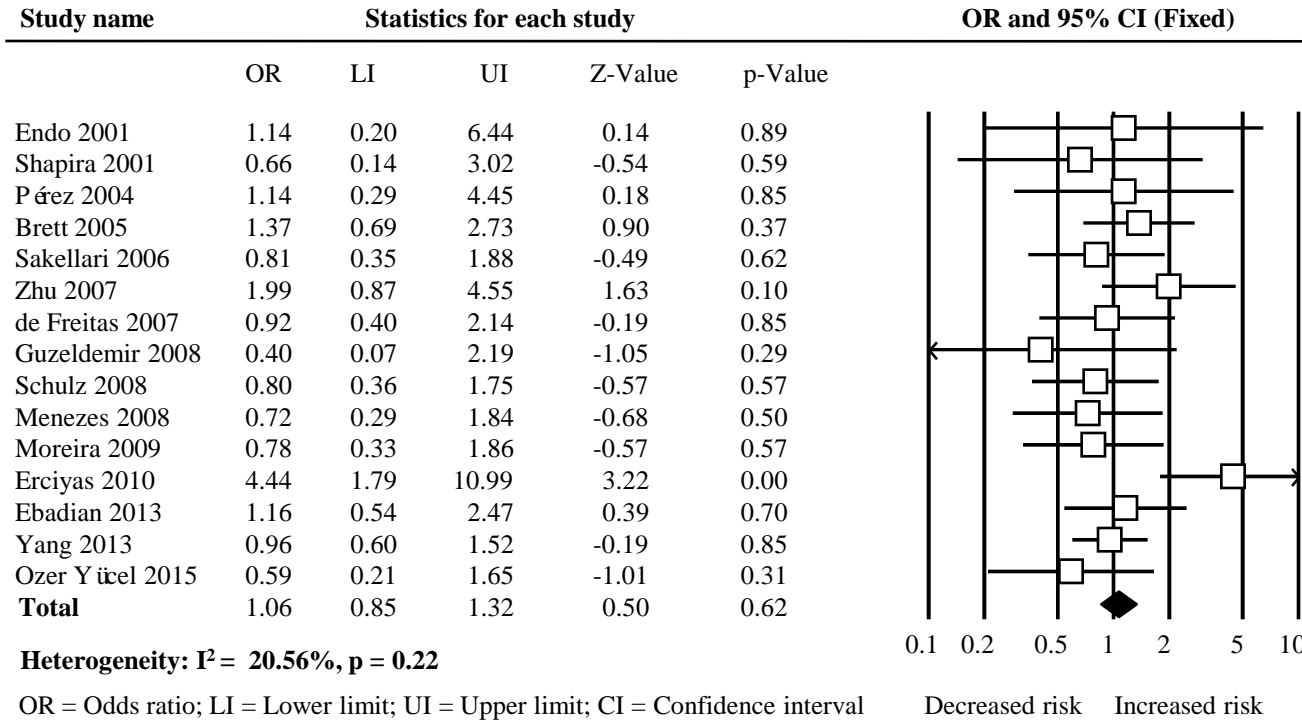

Supplementary Fig. S4 Forest plot of overall analysis in AA+AG vs. GG genetic model

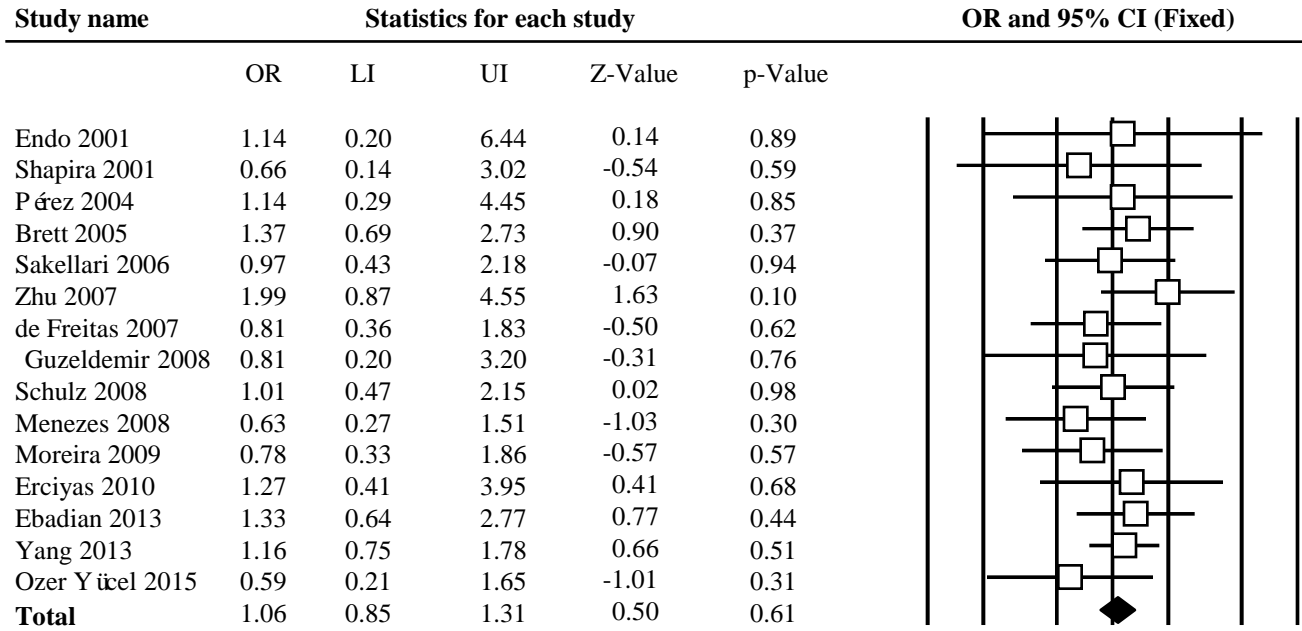

**Heterogeneity:  $I^2 = 0\%$ ,  $p = 0.91$**

OR = Odds ratio; LI = Lower limit; UI = Upper limit; CI = Confidence interval

Decreased risk    Increased risk

Supplementary Fig. S5 Forest plot of meta-regression analysis in A vs. G genetic model based on smoking status

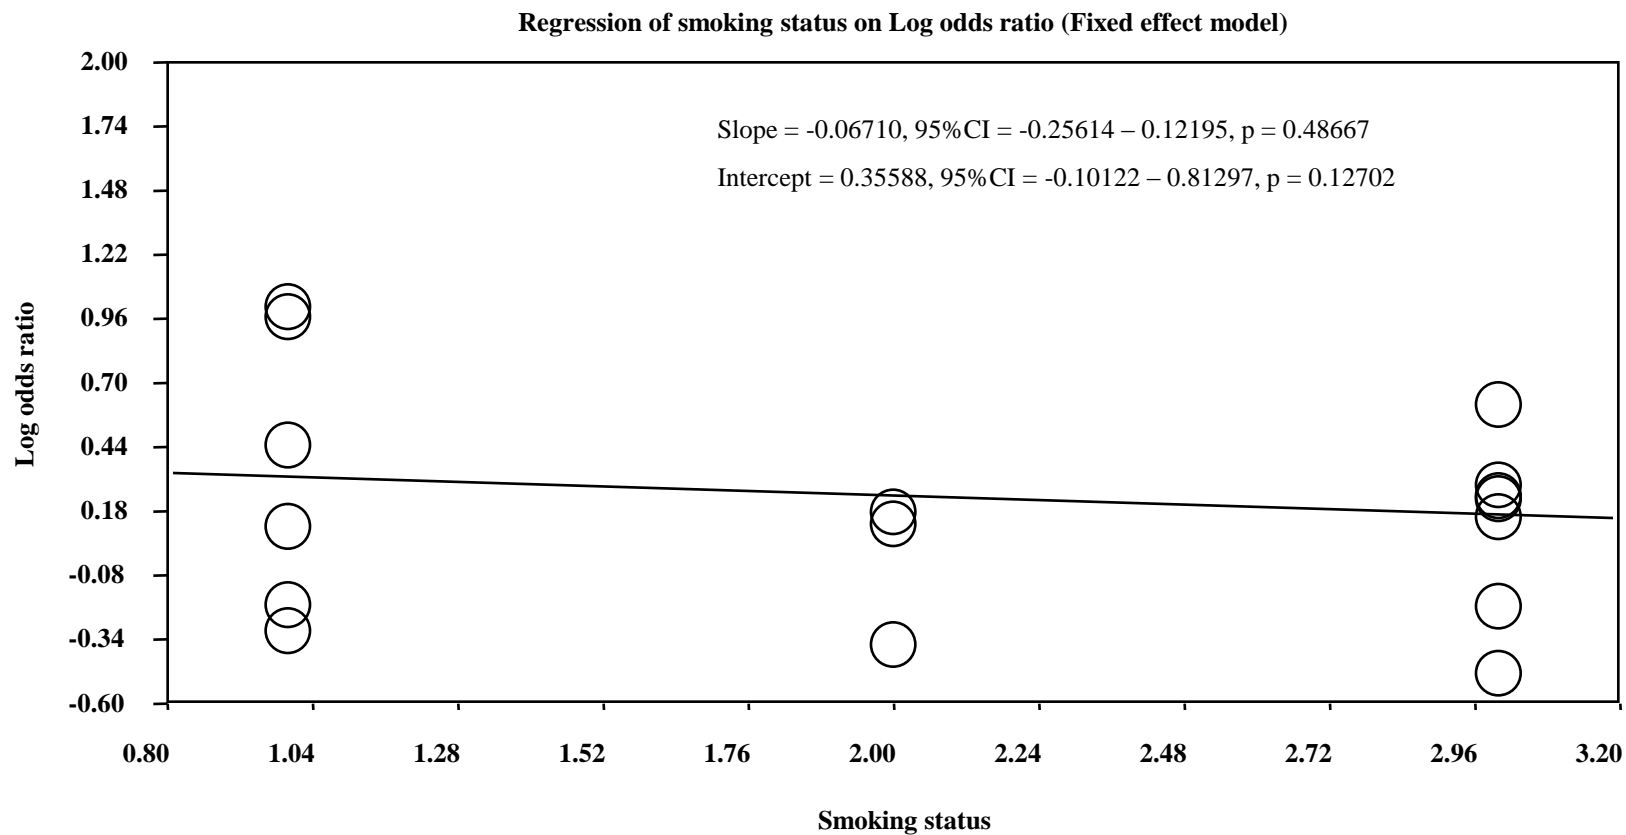

Supplement: srep19099-s1.pdf [file srep19099-s1.pdf]
